# Supplementary figures and images for: Regulation of ionic current through a surround-gated nanopore via field effect control
Source: Royal Society of Chemistry journal article supplement (doi:10.1039/d2cp02748h), 2022-01-01

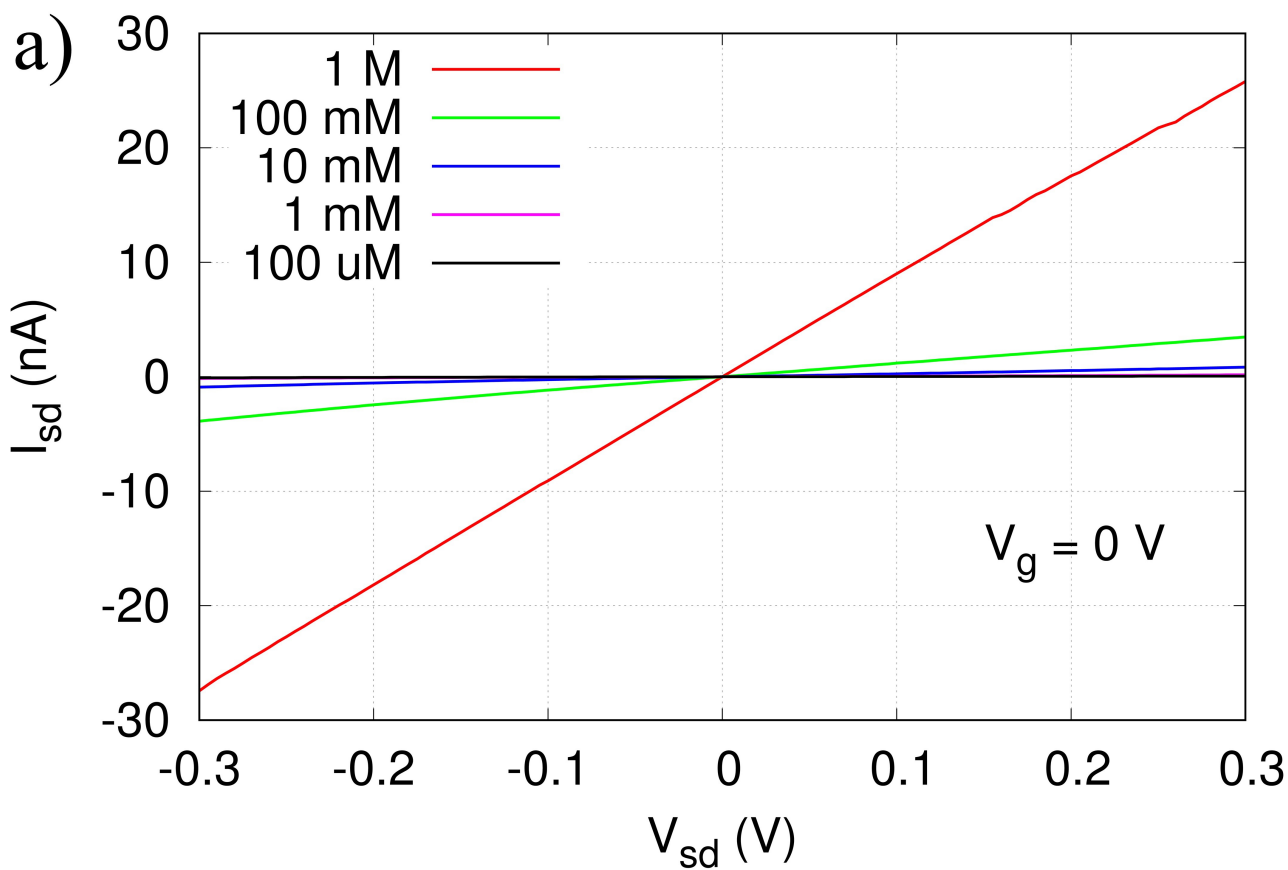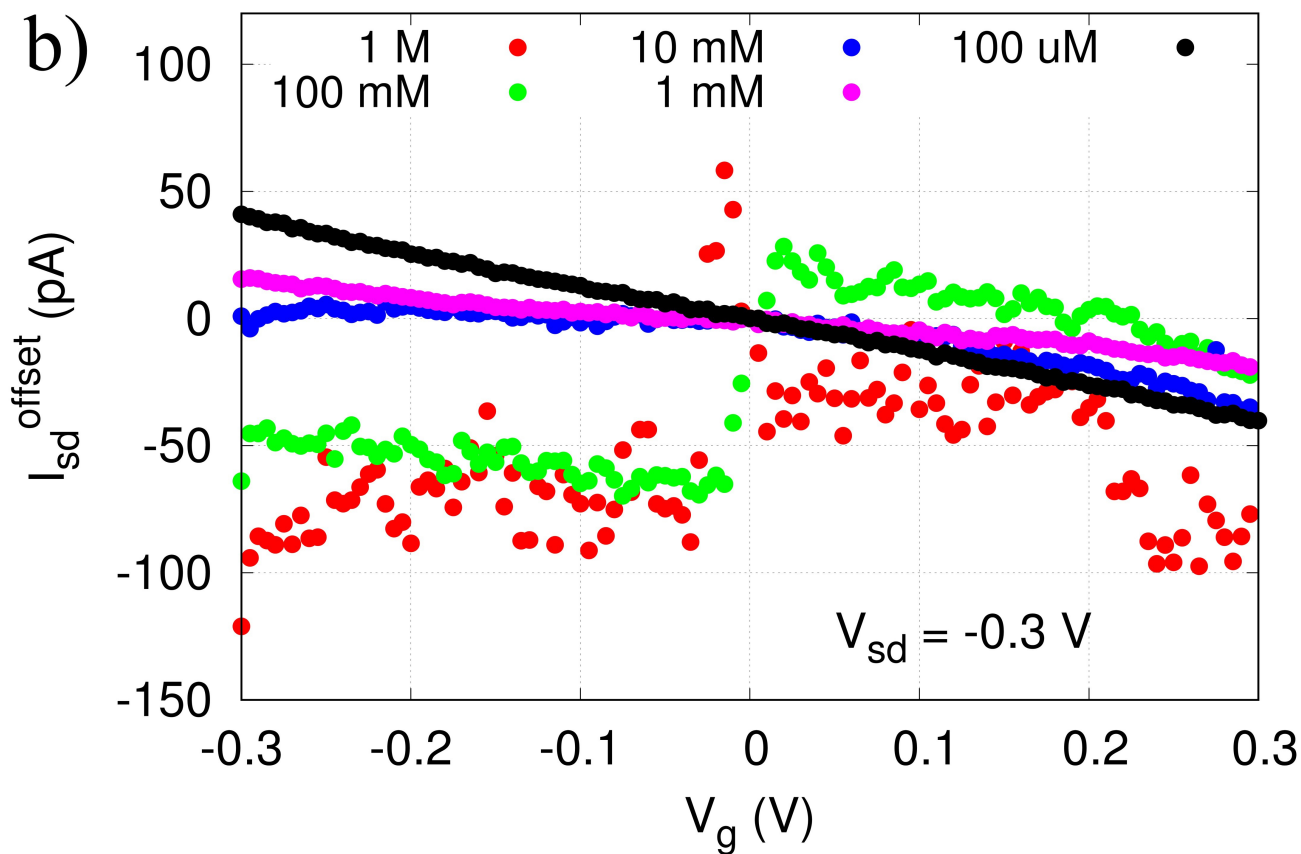

Supplement: d2cp02748h3.pdf [file d2cp02748h3.pdf]

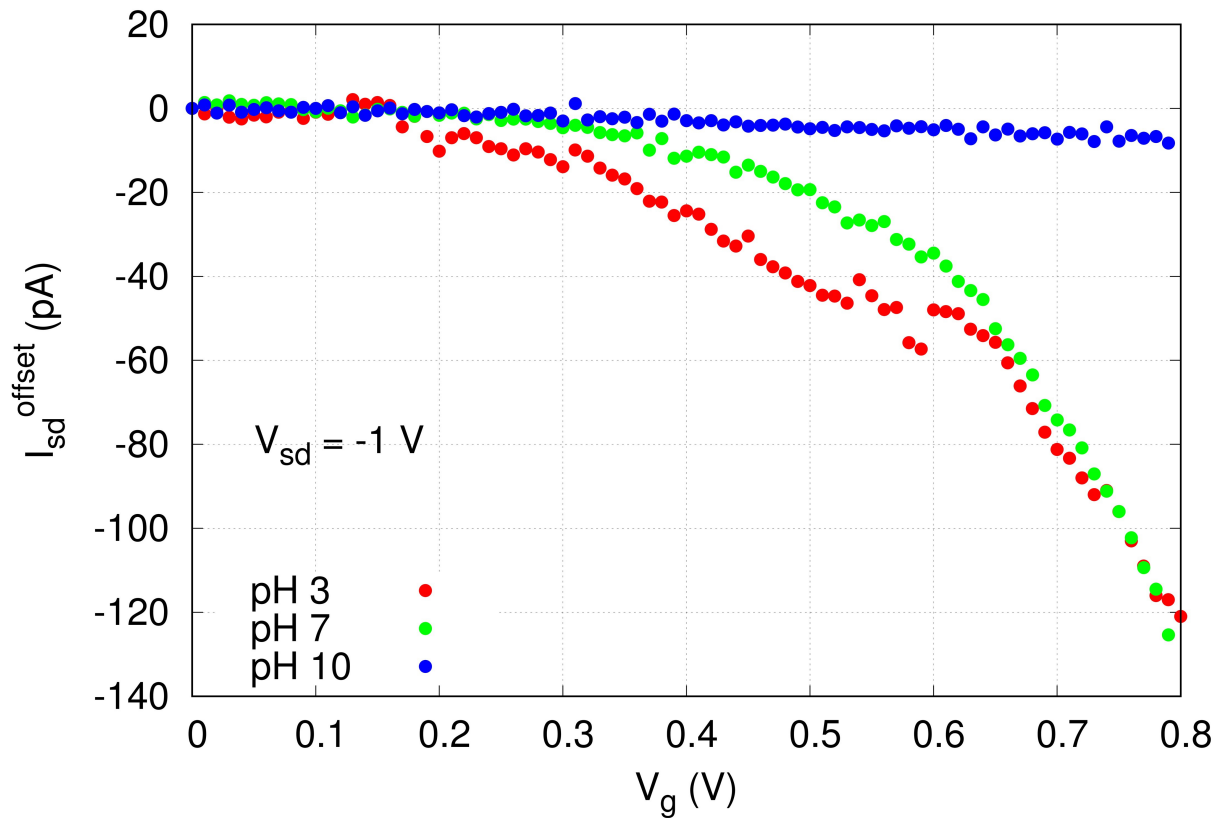

Supplement: d2cp02748h4.pdf [file d2cp02748h4.pdf]

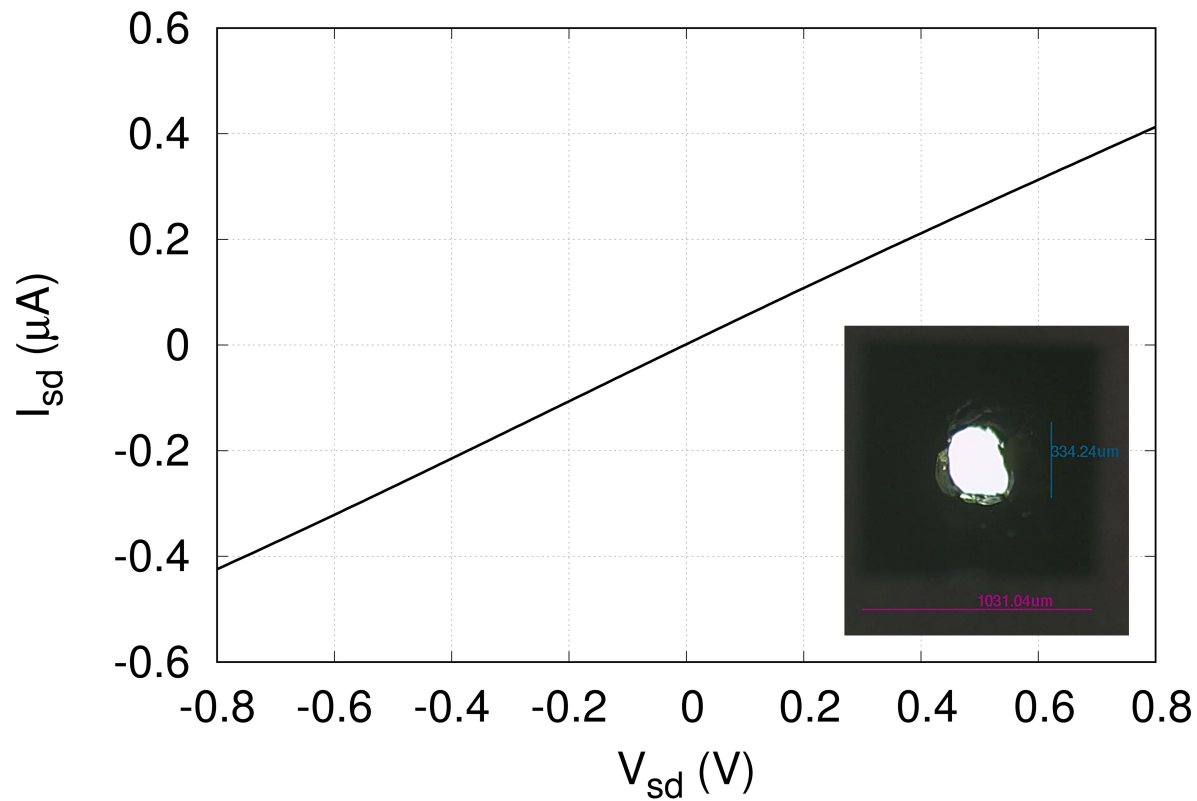

Supplement: d2cp02748h5.pdf [file d2cp02748h5.pdf]
